# Supplementary material
Source: publisher figshare collection journal article supplement (https://acs.figshare.com/ndownloader/files/4332073)
Supplement: Supplementary file 1 [file 4332073]

 
data_r4ge4cocp_0ma 
  
_audit_creation_method            SHELXL-97 
_chemical_name_systematic 
; 
 ? 
; 
_chemical_name_common             ? 
_chemical_melting_point           ? 
_chemical_formula_moiety          ? 
_chemical_formula_sum 
 'C41 H89 Co Ge4 Si4' 
_chemical_formula_weight          1043.77 
  
loop_ 
 _atom_type_symbol 
 _atom_type_description 
 _atom_type_scat_dispersion_real 
 _atom_type_scat_dispersion_imag 
 _atom_type_scat_source 
 'C'  'C'   0.0033   0.0016 
 'International Tables Vol C Tables 4.2.6.8 and 6.1.1.4' 
 'H'  'H'   0.0000   0.0000 
 'International Tables Vol C Tables 4.2.6.8 and 6.1.1.4' 
 'Si'  'Si'   0.0817   0.0704 
 'International Tables Vol C Tables 4.2.6.8 and 6.1.1.4' 
 'Co'  'Co'   0.3494   0.9721 
 'International Tables Vol C Tables 4.2.6.8 and 6.1.1.4' 
 'Ge'  'Ge'   0.1547   1.8001 
 'International Tables Vol C Tables 4.2.6.8 and 6.1.1.4' 
  
_symmetry_cell_setting           'Orthorhombic'
_symmetry_space_group_name_H-M   'Pccn '
loop_ 
 _symmetry_equiv_pos_as_xyz 
 'x, y, z' 
 '-x+1/2, -y+1/2, z' 
 '-x, y+1/2, -z+1/2' 
 'x+1/2, -y, -z+1/2' 
 '-x, -y, -z' 
 'x-1/2, y-1/2, -z' 
 'x, -y-1/2, z-1/2' 
 '-x-1/2, y, z-1/2' 
  
_cell_length_a                    19.3738(8) 
_cell_length_b                    15.9280(6) 
_cell_length_c                    17.0381(7) 
_cell_angle_alpha                 90.00 
_cell_angle_beta                  90.00 
_cell_angle_gamma                 90.00 
_cell_volume                      5257.7(4) 
_cell_formula_units_Z             4 
_cell_measurement_temperature     150 
_cell_measurement_reflns_used    8554
_cell_measurement_theta_min        2.39
_cell_measurement_theta_max       26.44
_exptl_crystal_description        'prism'
_exptl_crystal_colour             'purple'
_exptl_crystal_size_max           0.37 
_exptl_crystal_size_mid           0.25 
_exptl_crystal_size_min           0.25 
_exptl_crystal_density_meas       'not measured'  
_exptl_crystal_density_diffrn     1.319 
_exptl_crystal_density_method     'not measured' 
_exptl_crystal_F_000              2184 
_exptl_absorpt_coefficient_mu     2.685 
_exptl_absorpt_correction_type    empirical
_exptl_absorpt_correction_T_min   0.4365 
_exptl_absorpt_correction_T_max   0.5533 
_exptl_absorpt_process_details    
;
SADABS Sheldrick 1996
;
_exptl_special_details 
; 
 ? 
; 
  
_diffrn_ambient_temperature       150 
_diffrn_radiation_wavelength      0.71073 
_diffrn_radiation_type            MoK\a 
_diffrn_radiation_source          'fine-focus sealed tube' 
_diffrn_radiation_monochromator   graphite 
_diffrn_measurement_device_type   'Bruker APEXII CCD area detector' 
_diffrn_measurement_method        'phi and omega scans' 
_diffrn_detector_area_resol_mean  8.333
_diffrn_reflns_number             26509 
_diffrn_reflns_av_R_equivalents   0.0251 
_diffrn_reflns_av_sigmaI/netI     0.0218 
_diffrn_reflns_limit_h_min        -24 
_diffrn_reflns_limit_h_max        23 
_diffrn_reflns_limit_k_min        -15 
_diffrn_reflns_limit_k_max        19 
_diffrn_reflns_limit_l_min        -21 
_diffrn_reflns_limit_l_max        16 
_diffrn_reflns_theta_min          1.66 
_diffrn_reflns_theta_max          26.45 
_reflns_number_total              5410 
_reflns_number_gt                 4346 
_reflns_threshold_expression      >2sigma(I) 
  
_computing_data_collection        'APEX2 (Bruker AXS, 2006)'
_computing_cell_refinement        'APEX2 (Bruker AXS, 2006)'
_computing_data_reduction         'SAINT (Bruker AXS, 2004)'
_computing_structure_solution     'SHELXS-97 (Sheldrick, 1997)'
_computing_structure_refinement   'SHELXL-97 (Sheldrick, 1997)'
_computing_molecular_graphics     'XSHEL (Bruker AXS,2002)'
_computing_publication_material   'XCIF (Bruker AXS, 2001)' 
_refine_special_details 
; 
 Refinement of F^2^ against ALL reflections.  The weighted R-factor wR and 
 goodness of fit S are based on F^2^, conventional R-factors R are based 
 on F, with F set to zero for negative F^2^. The threshold expression of 
 F^2^ > 2sigma(F^2^) is used only for calculating R-factors(gt) etc. and is 
 not relevant to the choice of reflections for refinement.  R-factors based 
 on F^2^ are statistically about twice as large as those based on F, and R- 
 factors based on ALL data will be even larger. 
; 
  
_refine_ls_structure_factor_coef  Fsqd 
_refine_ls_matrix_type            full 
_refine_ls_weighting_scheme       calc 
_refine_ls_weighting_details 
 'calc w=1/[\s^2^(Fo^2^)+(0.0195P)^2^+2.3831P] where P=(Fo^2^+2Fc^2^)/3' 
_atom_sites_solution_primary      direct 
_atom_sites_solution_secondary    difmap 
_atom_sites_solution_hydrogens    geom 
_refine_ls_hydrogen_treatment     constr
_refine_ls_extinction_method      none 
_refine_ls_extinction_coef        ? 
_refine_ls_number_reflns          5410 
_refine_ls_number_parameters      254 
_refine_ls_number_restraints      2 
_refine_ls_R_factor_all           0.0326 
_refine_ls_R_factor_gt            0.0223 
_refine_ls_wR_factor_ref          0.0548 
_refine_ls_wR_factor_gt           0.0511 
_refine_ls_goodness_of_fit_ref    1.042 
_refine_ls_restrained_S_all       1.042 
_refine_ls_shift/su_max           0.002 
_refine_ls_shift/su_mean          0.000 
  
loop_ 
 _atom_site_label 
 _atom_site_type_symbol 
 _atom_site_fract_x 
 _atom_site_fract_y 
 _atom_site_fract_z 
 _atom_site_U_iso_or_equiv 
 _atom_site_adp_type 
 _atom_site_occupancy 
 _atom_site_symmetry_multiplicity 
 _atom_site_calc_flag 
 _atom_site_refinement_flags 
 _atom_site_disorder_assembly 
 _atom_site_disorder_group 
C1 C 0.51144(10) 0.15786(12) 0.07837(13) 0.0363(5) Uani 1 1 d . A 4 
H1A H 0.4623 0.1472 0.0874 0.055 Uiso 1 1 calc R A 4 
H1B H 0.5381 0.1079 0.0926 0.055 Uiso 1 1 calc R A 4 
H1C H 0.5190 0.1710 0.0228 0.055 Uiso 1 1 calc R A 4 
C2 C 0.49928(10) 0.34763(11) 0.09556(11) 0.0282(4) Uani 1 1 d . A 4 
C3 C 0.42244(11) 0.33240(15) 0.07583(16) 0.0518(6) Uani 1 1 d . A 4 
H3A H 0.3974 0.3176 0.1238 0.078 Uiso 1 1 calc R A 4 
H3B H 0.4186 0.2864 0.0379 0.078 Uiso 1 1 calc R A 4 
H3C H 0.4026 0.3836 0.0533 0.078 Uiso 1 1 calc R A 4 
C4 C 0.50404(11) 0.42396(11) 0.14987(12) 0.0337(5) Uani 1 1 d . A 4 
H4A H 0.5518 0.4310 0.1675 0.051 Uiso 1 1 calc R A 4 
H4B H 0.4740 0.4154 0.1955 0.051 Uiso 1 1 calc R A 4 
H4C H 0.4893 0.4743 0.1214 0.051 Uiso 1 1 calc R A 4 
C5 C 0.53731(12) 0.36832(13) 0.01895(12) 0.0435(6) Uani 1 1 d . A 4 
H5A H 0.5167 0.4183 -0.0051 0.065 Uiso 1 1 calc R A 4 
H5B H 0.5335 0.3208 -0.0173 0.065 Uiso 1 1 calc R A 4 
H5C H 0.5861 0.3791 0.0303 0.065 Uiso 1 1 calc R A 4 
C6 C 0.51584(9) 0.22787(11) 0.24768(12) 0.0273(4) Uani 1 1 d . A 4 
C7 C 0.54095(11) 0.13979(13) 0.27018(13) 0.0420(5) Uani 1 1 d . A 4 
H7A H 0.5909 0.1360 0.2619 0.063 Uiso 1 1 calc R A 4 
H7B H 0.5176 0.0979 0.2375 0.063 Uiso 1 1 calc R A 4 
H7C H 0.5304 0.1291 0.3255 0.063 Uiso 1 1 calc R A 4 
C8 C 0.43690(10) 0.22979(13) 0.25881(14) 0.0410(5) Uani 1 1 d . A 4 
H8A H 0.4254 0.2118 0.3122 0.061 Uiso 1 1 calc R A 4 
H8B H 0.4152 0.1918 0.2209 0.061 Uiso 1 1 calc R A 4 
H8C H 0.4199 0.2870 0.2503 0.061 Uiso 1 1 calc R A 4 
C9 C 0.54890(10) 0.29139(13) 0.30394(11) 0.0349(5) Uani 1 1 d . A 4 
H9A H 0.5363 0.2774 0.3581 0.052 Uiso 1 1 calc R A 4 
H9B H 0.5323 0.3480 0.2914 0.052 Uiso 1 1 calc R A 4 
H9C H 0.5992 0.2894 0.2983 0.052 Uiso 1 1 calc R A 4 
C10 C 0.82561(10) -0.03929(12) 0.08011(12) 0.0348(5) Uani 1 1 d . A 4 
H10A H 0.8330 -0.0997 0.0867 0.052 Uiso 1 1 calc R A 4 
H10B H 0.8665 -0.0087 0.0982 0.052 Uiso 1 1 calc R A 4 
H10C H 0.8175 -0.0268 0.0246 0.052 Uiso 1 1 calc R A 4 
C11 C 0.66907(10) -0.05352(12) 0.08905(12) 0.0296(4) Uani 1 1 d . A 4 
C12 C 0.68205(12) -0.14610(13) 0.06647(15) 0.0481(6) Uani 1 1 d . A 4 
H12A H 0.6924 -0.1787 0.1138 0.072 Uiso 1 1 calc R A 4 
H12B H 0.7212 -0.1493 0.0302 0.072 Uiso 1 1 calc R A 4 
H12C H 0.6408 -0.1691 0.0410 0.072 Uiso 1 1 calc R A 4 
C13 C 0.60491(10) -0.04909(13) 0.14104(12) 0.0352(5) Uani 1 1 d . A 4 
H13A H 0.5642 -0.0653 0.1104 0.053 Uiso 1 1 calc R A 4 
H13B H 0.5991 0.0084 0.1605 0.053 Uiso 1 1 calc R A 4 
H13C H 0.6103 -0.0875 0.1855 0.053 Uiso 1 1 calc R A 4 
C14 C 0.65445(11) -0.00444(14) 0.01335(12) 0.0400(5) Uani 1 1 d . A 4 
H14A H 0.6140 -0.0285 -0.0130 0.060 Uiso 1 1 calc R A 4 
H14B H 0.6946 -0.0080 -0.0215 0.060 Uiso 1 1 calc R A 4 
H14C H 0.6454 0.0545 0.0262 0.060 Uiso 1 1 calc R A 4 
C15 C 0.76190(9) -0.03954(11) 0.24664(11) 0.0261(4) Uani 1 1 d . A 4 
C16 C 0.83470(10) -0.01179(12) 0.27166(12) 0.0351(5) Uani 1 1 d . A 4 
H16A H 0.8390 0.0491 0.2655 0.053 Uiso 1 1 calc R A 4 
H16B H 0.8691 -0.0400 0.2387 0.053 Uiso 1 1 calc R A 4 
H16C H 0.8423 -0.0269 0.3267 0.053 Uiso 1 1 calc R A 4 
C17 C 0.75716(10) -0.13562(12) 0.25527(14) 0.0377(5) Uani 1 1 d . A 4 
H17A H 0.7713 -0.1518 0.3084 0.057 Uiso 1 1 calc R A 4 
H17B H 0.7877 -0.1624 0.2169 0.057 Uiso 1 1 calc R A 4 
H17C H 0.7095 -0.1537 0.2461 0.057 Uiso 1 1 calc R A 4 
C18 C 0.70966(11) 0.00125(13) 0.30224(11) 0.0351(5) Uani 1 1 d . A 4 
H18A H 0.6629 -0.0167 0.2880 0.053 Uiso 1 1 calc R A 4 
H18B H 0.7130 0.0625 0.2981 0.053 Uiso 1 1 calc R A 4 
H18C H 0.7196 -0.0159 0.3563 0.053 Uiso 1 1 calc R A 4 
C19 C 0.7580(7) 0.1687(2) -0.0608(3) 0.0511(18) Uani 0.50 1 d PGD A -1 
H19 H 0.7651 0.1098 -0.0574 0.061 Uiso 0.50 1 calc PR A -1 
C20 C 0.6930(4) 0.2101(6) -0.0617(4) 0.0455(19) Uani 0.50 1 d PGD A -1 
H20 H 0.6491 0.1838 -0.0590 0.055 Uiso 0.50 1 calc PR A -1 
C21 C 0.7053(3) 0.2978(5) -0.0672(4) 0.0342(18) Uani 0.50 1 d PGD A -1 
H21 H 0.6711 0.3404 -0.0689 0.041 Uiso 0.50 1 calc PR A -1 
C22 C 0.7779(3) 0.3106(3) -0.0697(3) 0.0249(13) Uani 0.50 1 d PGD A -1 
H22 H 0.8006 0.3633 -0.0734 0.030 Uiso 0.50 1 calc PR A -1 
C23 C 0.8104(3) 0.2308(6) -0.0658(4) 0.043(2) Uani 0.50 1 d PGD A -1 
H23 H 0.8587 0.2207 -0.0663 0.051 Uiso 0.50 1 calc PR A -1 
Co1 Co 0.7500 0.2500 0.033563(18) 0.01954(8) Uani 1 2 d S . . 
Ge1 Ge 0.663964(9) 0.255146(11) 0.139767(11) 0.02269(6) Uani 1 1 d . . . 
Ge2 Ge 0.745736(9) 0.145150(11) 0.142924(11) 0.02282(6) Uani 1 1 d . . . 
Si1 Si 0.54009(2) 0.24913(3) 0.14037(3) 0.02091(10) Uani 1 1 d . . . 
Si2 Si 0.74869(2) -0.00589(3) 0.13919(3) 0.02106(10) Uani 1 1 d . . . 
  
loop_ 
 _atom_site_aniso_label 
 _atom_site_aniso_U_11 
 _atom_site_aniso_U_22 
 _atom_site_aniso_U_33 
 _atom_site_aniso_U_23 
 _atom_site_aniso_U_13 
 _atom_site_aniso_U_12 
C1 0.0340(11) 0.0273(10) 0.0477(13) -0.0092(9) -0.0097(10) -0.0006(9) 
C2 0.0317(10) 0.0238(9) 0.0292(10) 0.0009(8) -0.0078(8) 0.0067(8) 
C3 0.0405(13) 0.0477(13) 0.0673(17) -0.0028(12) -0.0289(12) 0.0141(11) 
C4 0.0446(12) 0.0230(10) 0.0336(12) 0.0007(8) -0.0001(9) 0.0040(9) 
C5 0.0706(16) 0.0330(11) 0.0269(12) 0.0047(9) -0.0037(11) 0.0171(11) 
C6 0.0233(9) 0.0272(10) 0.0316(10) 0.0043(8) 0.0061(8) 0.0016(7) 
C7 0.0508(13) 0.0349(12) 0.0403(13) 0.0150(10) 0.0162(10) 0.0087(10) 
C8 0.0284(11) 0.0377(12) 0.0568(15) -0.0020(10) 0.0139(10) -0.0027(9) 
C9 0.0371(11) 0.0424(12) 0.0252(11) 0.0022(9) 0.0010(9) 0.0020(9) 
C10 0.0328(11) 0.0315(10) 0.0402(12) -0.0081(9) 0.0092(9) 0.0020(9) 
C11 0.0313(10) 0.0255(9) 0.0320(11) -0.0060(8) -0.0001(9) -0.0062(8) 
C12 0.0506(13) 0.0316(11) 0.0620(16) -0.0197(11) -0.0034(12) -0.0083(10) 
C13 0.0269(10) 0.0359(11) 0.0428(13) 0.0035(9) -0.0012(9) -0.0049(8) 
C14 0.0423(12) 0.0492(13) 0.0285(11) -0.0028(9) -0.0065(9) -0.0133(10) 
C15 0.0273(10) 0.0220(9) 0.0289(10) 0.0036(8) -0.0001(8) 0.0013(7) 
C16 0.0357(11) 0.0342(11) 0.0355(12) 0.0082(9) -0.0073(9) -0.0037(9) 
C17 0.0347(11) 0.0262(10) 0.0521(13) 0.0132(9) -0.0009(10) -0.0010(9) 
C18 0.0404(12) 0.0395(11) 0.0254(11) 0.0034(9) 0.0040(9) 0.0008(9) 
C19 0.096(6) 0.036(3) 0.021(3) -0.011(2) 0.010(4) 0.000(4) 
C20 0.049(5) 0.068(5) 0.019(3) 0.002(3) -0.011(3) -0.020(4) 
C21 0.030(3) 0.054(4) 0.019(3) 0.015(3) -0.002(2) 0.001(3) 
C22 0.026(3) 0.029(3) 0.020(2) 0.012(2) -0.003(3) -0.005(2) 
C23 0.047(4) 0.058(5) 0.024(3) 0.013(3) 0.014(3) 0.021(4) 
Co1 0.02229(16) 0.02070(16) 0.01563(15) 0.000 0.000 -0.00105(14) 
Ge1 0.01732(10) 0.01950(10) 0.03127(11) 0.00026(8) 0.00163(7) -0.00047(7) 
Ge2 0.02125(10) 0.01531(9) 0.03189(11) 0.00101(7) 0.00017(9) -0.00064(7) 
Si1 0.0177(2) 0.0194(2) 0.0256(2) -0.0004(2) -0.00348(18) 0.00021(18) 
Si2 0.0229(2) 0.0161(2) 0.0242(2) -0.00261(18) 0.0025(2) -0.00079(18) 
  
_geom_special_details 
; 
 All esds (except the esd in the dihedral angle between two l.s. planes) 
 are estimated using the full covariance matrix.  The cell esds are taken 
 into account individually in the estimation of esds in distances, angles 
 and torsion angles; correlations between esds in cell parameters are only 
 used when they are defined by crystal symmetry.  An approximate (isotropic) 
 treatment of cell esds is used for estimating esds involving l.s. planes. 
; 
  
loop_ 
 _geom_bond_atom_site_label_1 
 _geom_bond_atom_site_label_2 
 _geom_bond_distance 
 _geom_bond_site_symmetry_2 
 _geom_bond_publ_flag 
C1 Si1 1.8808(19) . ? 
C1 H1A 0.9800 . ? 
C1 H1B 0.9800 . ? 
C1 H1C 0.9800 . ? 
C2 C4 1.531(3) . ? 
C2 C5 1.535(3) . ? 
C2 C3 1.545(3) . ? 
C2 Si1 1.9156(18) . ? 
C3 H3A 0.9800 . ? 
C3 H3B 0.9800 . ? 
C3 H3C 0.9800 . ? 
C4 H4A 0.9800 . ? 
C4 H4B 0.9800 . ? 
C4 H4C 0.9800 . ? 
C5 H5A 0.9800 . ? 
C5 H5B 0.9800 . ? 
C5 H5C 0.9800 . ? 
C6 C7 1.534(3) . ? 
C6 C9 1.534(3) . ? 
C6 C8 1.541(3) . ? 
C6 Si1 1.918(2) . ? 
C7 H7A 0.9800 . ? 
C7 H7B 0.9800 . ? 
C7 H7C 0.9800 . ? 
C8 H8A 0.9800 . ? 
C8 H8B 0.9800 . ? 
C8 H8C 0.9800 . ? 
C9 H9A 0.9800 . ? 
C9 H9B 0.9800 . ? 
C9 H9C 0.9800 . ? 
C10 Si2 1.8753(19) . ? 
C10 H10A 0.9800 . ? 
C10 H10B 0.9800 . ? 
C10 H10C 0.9800 . ? 
C11 C13 1.528(3) . ? 
C11 C14 1.534(3) . ? 
C11 C12 1.545(3) . ? 
C11 Si2 1.9197(19) . ? 
C12 H12A 0.9800 . ? 
C12 H12B 0.9800 . ? 
C12 H12C 0.9800 . ? 
C13 H13A 0.9800 . ? 
C13 H13B 0.9800 . ? 
C13 H13C 0.9800 . ? 
C14 H14A 0.9800 . ? 
C14 H14B 0.9800 . ? 
C14 H14C 0.9800 . ? 
C15 C18 1.531(3) . ? 
C15 C16 1.538(2) . ? 
C15 C17 1.540(2) . ? 
C15 Si2 1.9247(19) . ? 
C16 H16A 0.9800 . ? 
C16 H16B 0.9800 . ? 
C16 H16C 0.9800 . ? 
C17 H17A 0.9800 . ? 
C17 H17B 0.9800 . ? 
C17 H17C 0.9800 . ? 
C18 H18A 0.9800 . ? 
C18 H18B 0.9800 . ? 
C18 H18C 0.9800 . ? 
C19 C20 1.4200 . ? 
C19 C23 1.4200 . ? 
C19 Co1 2.070(4) . ? 
C19 H19 0.9500 . ? 
C20 C21 1.4200 . ? 
C20 Co1 2.062(5) . ? 
C20 H20 0.9500 . ? 
C21 C22 1.4200 . ? 
C21 Co1 2.068(6) . ? 
C21 H21 0.9500 . ? 
C22 C23 1.4200 . ? 
C22 Co1 2.078(4) . ? 
C22 H22 0.9500 . ? 
C23 Co1 2.080(6) . ? 
C23 H23 0.9500 . ? 
Co1 C20 2.062(5) 2_655 ? 
Co1 C21 2.068(6) 2_655 ? 
Co1 C19 2.070(4) 2_655 ? 
Co1 C22 2.078(4) 2_655 ? 
Co1 C23 2.080(6) 2_655 ? 
Co1 Ge1 2.4616(3) . ? 
Co1 Ge1 2.4616(3) 2_655 ? 
Co1 Ge2 2.5035(3) 2_655 ? 
Co1 Ge2 2.5036(3) . ? 
Ge1 Ge2 2.3627(3) . ? 
Ge1 Ge2 2.3634(3) 2_655 ? 
Ge1 Si1 2.4018(5) . ? 
Ge2 Ge1 2.3634(3) 2_655 ? 
Ge2 Si2 2.4073(5) . ? 
  
loop_ 
 _geom_angle_atom_site_label_1 
 _geom_angle_atom_site_label_2 
 _geom_angle_atom_site_label_3 
 _geom_angle 
 _geom_angle_site_symmetry_1 
 _geom_angle_site_symmetry_3 
 _geom_angle_publ_flag 
Si1 C1 H1A 109.5 . . ? 
Si1 C1 H1B 109.5 . . ? 
Si1 C1 H1C 109.5 . . ? 
C4 C2 C5 108.34(16) . . ? 
C4 C2 C3 108.31(17) . . ? 
C5 C2 C3 108.13(18) . . ? 
C4 C2 Si1 112.62(13) . . ? 
C5 C2 Si1 108.46(13) . . ? 
C3 C2 Si1 110.84(14) . . ? 
C7 C6 C9 108.34(17) . . ? 
C7 C6 C8 107.58(16) . . ? 
C9 C6 C8 108.93(16) . . ? 
C7 C6 Si1 108.79(13) . . ? 
C9 C6 Si1 112.15(13) . . ? 
C8 C6 Si1 110.91(14) . . ? 
Si2 C10 H10A 109.5 . . ? 
Si2 C10 H10B 109.5 . . ? 
Si2 C10 H10C 109.5 . . ? 
C13 C11 C14 108.28(17) . . ? 
C13 C11 C12 108.72(16) . . ? 
C14 C11 C12 107.89(17) . . ? 
C13 C11 Si2 112.17(13) . . ? 
C14 C11 Si2 108.72(13) . . ? 
C12 C11 Si2 110.93(14) . . ? 
C18 C15 C16 108.22(16) . . ? 
C18 C15 C17 108.86(16) . . ? 
C16 C15 C17 108.28(15) . . ? 
C18 C15 Si2 112.49(13) . . ? 
C16 C15 Si2 107.79(12) . . ? 
C17 C15 Si2 111.08(14) . . ? 
C20 C19 C23 108.0 . . ? 
C20 C19 Co1 69.6(3) . . ? 
C23 C19 Co1 70.4(2) . . ? 
C20 C19 H19 126.0 . . ? 
C23 C19 H19 126.0 . . ? 
Co1 C19 H19 125.6 . . ? 
C21 C20 C19 108.0 . . ? 
C21 C20 Co1 70.10(17) . . ? 
C19 C20 Co1 70.2(3) . . ? 
C21 C20 H20 126.0 . . ? 
C19 C20 H20 126.0 . . ? 
Co1 C20 H20 125.3 . . ? 
C22 C21 C20 108.0 . . ? 
C22 C21 Co1 70.4(3) . . ? 
C20 C21 Co1 69.68(17) . . ? 
C22 C21 H21 126.0 . . ? 
C20 C21 H21 126.0 . . ? 
Co1 C21 H21 125.5 . . ? 
C21 C22 C23 108.0 . . ? 
C21 C22 Co1 69.6(3) . . ? 
C23 C22 Co1 70.1(2) . . ? 
C21 C22 H22 126.0 . . ? 
C23 C22 H22 126.0 . . ? 
Co1 C22 H22 125.9 . . ? 
C22 C23 C19 108.0 . . ? 
C22 C23 Co1 70.0(2) . . ? 
C19 C23 Co1 69.61(18) . . ? 
C22 C23 H23 126.0 . . ? 
C19 C23 H23 126.0 . . ? 
Co1 C23 H23 126.0 . . ? 
C20 Co1 C20 76.25(17) . 2_655 ? 
C20 Co1 C21 57.1(5) . 2_655 ? 
C20 Co1 C21 40.22(10) 2_655 2_655 ? 
C20 Co1 C21 40.22(10) . . ? 
C20 Co1 C21 57.1(3) 2_655 . ? 
C21 Co1 C21 67.74(16) 2_655 . ? 
C20 Co1 C19 40.20(7) . . ? 
C20 Co1 C19 62.8(5) 2_655 . ? 
C21 Co1 C19 25.0(7) 2_655 . ? 
C21 Co1 C19 67.47(8) . . ? 
C20 Co1 C19 62.8(2) . 2_655 ? 
C20 Co1 C19 40.2(6) 2_655 2_655 ? 
C21 Co1 C19 67.5(3) 2_655 2_655 ? 
C21 Co1 C19 25.0(2) . 2_655 ? 
C19 Co1 C19 78.1(2) . 2_655 ? 
C20 Co1 C22 67.40(8) . . ? 
C20 Co1 C22 18.5(4) 2_655 . ? 
C21 Co1 C22 50.1(4) 2_655 . ? 
C21 Co1 C22 40.06(7) . . ? 
C19 Co1 C22 67.27(9) . . ? 
C19 Co1 C22 21.77(19) 2_655 . ? 
C20 Co1 C22 18.5(7) . 2_655 ? 
C20 Co1 C22 67.40(9) 2_655 2_655 ? 
C21 Co1 C22 40.06(8) 2_655 2_655 ? 
C21 Co1 C22 50.1(5) . 2_655 ? 
C19 Co1 C22 21.8(7) . 2_655 ? 
C19 Co1 C22 67.3(2) 2_655 2_655 ? 
C22 Co1 C22 64.26(16) . 2_655 ? 
C20 Co1 C23 26.4(6) . 2_655 ? 
C20 Co1 C23 67.38(8) 2_655 2_655 ? 
C21 Co1 C23 67.28(6) 2_655 2_655 ? 
C21 Co1 C23 15.2(5) . 2_655 ? 
C19 Co1 C23 60.1(5) . 2_655 ? 
C19 Co1 C23 40.0(5) 2_655 2_655 ? 
C22 Co1 C23 52.3(3) . 2_655 ? 
C22 Co1 C23 39.94(10) 2_655 2_655 ? 
C20 Co1 C23 67.38(7) . . ? 
C20 Co1 C23 26.4(5) 2_655 . ? 
C21 Co1 C23 15.2(6) 2_655 . ? 
C21 Co1 C23 67.28(6) . . ? 
C19 Co1 C23 40.02(10) . . ? 
C19 Co1 C23 60.1(2) 2_655 . ? 
C22 Co1 C23 39.94(9) . . ? 
C22 Co1 C23 52.3(5) 2_655 . ? 
C23 Co1 C23 71.08(16) 2_655 . ? 
C20 Co1 Ge1 103.1(2) . . ? 
C20 Co1 Ge1 158.5(3) 2_655 . ? 
C21 Co1 Ge1 154.9(3) 2_655 . ? 
C21 Co1 Ge1 108.35(11) . . ? 
C19 Co1 Ge1 129.9(3) . . ? 
C19 Co1 Ge1 120.0(3) 2_655 . ? 
C22 Co1 Ge1 141.5(2) . . ? 
C22 Co1 Ge1 117.5(2) 2_655 . ? 
C23 Co1 Ge1 102.27(14) 2_655 . ? 
C23 Co1 Ge1 169.7(3) . . ? 
C20 Co1 Ge1 158.5(3) . 2_655 ? 
C20 Co1 Ge1 103.08(16) 2_655 2_655 ? 
C21 Co1 Ge1 108.3(2) 2_655 2_655 ? 
C21 Co1 Ge1 154.9(2) . 2_655 ? 
C19 Co1 Ge1 120.0(3) . 2_655 ? 
C19 Co1 Ge1 129.9(3) 2_655 2_655 ? 
C22 Co1 Ge1 117.53(14) . 2_655 ? 
C22 Co1 Ge1 141.5(3) 2_655 2_655 ? 
C23 Co1 Ge1 169.7(2) 2_655 2_655 ? 
C23 Co1 Ge1 102.27(16) . 2_655 ? 
Ge1 Co1 Ge1 85.368(14) . 2_655 ? 
C20 Co1 Ge2 144.0(3) . 2_655 ? 
C20 Co1 Ge2 111.2(2) 2_655 2_655 ? 
C21 Co1 Ge2 148.2(3) 2_655 2_655 ? 
C21 Co1 Ge2 112.7(2) . 2_655 ? 
C19 Co1 Ge2 173.1(3) . 2_655 ? 
C19 Co1 Ge2 99.38(11) 2_655 2_655 ? 
C22 Co1 Ge2 108.18(14) . 2_655 ? 
C22 Co1 Ge2 161.5(3) 2_655 2_655 ? 
C23 Co1 Ge2 121.7(3) 2_655 2_655 ? 
C23 Co1 Ge2 133.3(3) . 2_655 ? 
Ge1 Co1 Ge2 56.841(8) . 2_655 ? 
Ge1 Co1 Ge2 56.821(8) 2_655 2_655 ? 
C20 Co1 Ge2 111.24(19) . . ? 
C20 Co1 Ge2 144.0(3) 2_655 . ? 
C21 Co1 Ge2 112.72(19) 2_655 . ? 
C21 Co1 Ge2 148.2(2) . . ? 
C19 Co1 Ge2 99.38(11) . . ? 
C19 Co1 Ge2 173.1(3) 2_655 . ? 
C22 Co1 Ge2 161.5(2) . . ? 
C22 Co1 Ge2 108.18(12) 2_655 . ? 
C23 Co1 Ge2 133.3(3) 2_655 . ? 
C23 Co1 Ge2 121.7(2) . . ? 
Ge1 Co1 Ge2 56.822(8) . . ? 
Ge1 Co1 Ge2 56.841(8) 2_655 . ? 
Ge2 Co1 Ge2 83.810(13) 2_655 . ? 
Ge2 Ge1 Ge2 90.081(9) . 2_655 ? 
Ge2 Ge1 Si1 129.814(14) . . ? 
Ge2 Ge1 Si1 140.028(14) 2_655 . ? 
Ge2 Ge1 Co1 62.484(7) . . ? 
Ge2 Ge1 Co1 62.474(7) 2_655 . ? 
Si1 Ge1 Co1 132.719(15) . . ? 
Ge1 Ge2 Ge1 89.859(9) . 2_655 ? 
Ge1 Ge2 Si2 139.150(14) . . ? 
Ge1 Ge2 Si2 130.793(14) 2_655 . ? 
Ge1 Ge2 Co1 60.694(7) . . ? 
Ge1 Ge2 Co1 60.686(7) 2_655 . ? 
Si2 Ge2 Co1 130.254(15) . . ? 
C1 Si1 C2 106.70(9) . . ? 
C1 Si1 C6 109.07(9) . . ? 
C2 Si1 C6 115.05(8) . . ? 
C1 Si1 Ge1 108.86(7) . . ? 
C2 Si1 Ge1 112.22(6) . . ? 
C6 Si1 Ge1 104.83(6) . . ? 
C1 Si1 Co1 92.43(7) . . ? 
C2 Si1 Co1 102.21(6) . . ? 
C6 Si1 Co1 127.85(6) . . ? 
Ge1 Si1 Co1 23.949(9) . . ? 
C10 Si2 C11 106.72(9) . . ? 
C10 Si2 C15 109.02(9) . . ? 
C11 Si2 C15 114.84(8) . . ? 
C10 Si2 Ge2 108.46(6) . . ? 
C11 Si2 Ge2 112.81(6) . . ? 
C15 Si2 Ge2 104.85(6) . . ? 
C10 Si2 Co1 92.19(6) . . ? 
C11 Si2 Co1 100.74(6) . . ? 
C15 Si2 Co1 129.66(6) . . ? 
Ge2 Si2 Co1 25.394(9) . . ? 
  
_diffrn_measured_fraction_theta_max    0.999 
_diffrn_reflns_theta_full              26.45 
_diffrn_measured_fraction_theta_full   0.999 
_refine_diff_density_max    0.355 
_refine_diff_density_min   -0.286 
_refine_diff_density_rms    0.050 
